# Supplementary material for: Synergistically coupling P-doped Mo2C@N, P dual-doped carbon-nanoribbons as an efficient electrocatalyst for the hydrogen evolution reaction
Source: Royal Society of Chemistry journal article supplement (doi:10.1039/d2nj01553f), 2022-01-01
Supplement: d2nj01553f1.pdf [file d2nj01553f1.pdf]

## Supporting information

### **Synergistically Coupling P-doped Mo<sub>2</sub>C@N, P Dual-coped Carbon-nanoribbons as an Efficient Electrocatalyst for Hydrogen Evolution Reaction**

Baoli Wang<sup>1,2,=</sup>, Yuhao Huang<sup>1,=</sup>, Yijing Ai<sup>1</sup>, Yucen Yao<sup>1,3</sup>, Fan Shi<sup>1</sup>, Shiguan Xu<sup>1</sup>, Zejun Zhang<sup>1,4</sup>, Xianghui Wang<sup>1,\*</sup>, Wei Sun<sup>1,\*</sup>

<sup>1</sup> Key Laboratory of Water Pollution Treatment and Resource Rouse of Hainan Province, Key Laboratory of Functional Materials and Photoelectrochemistry of Haikou, College of Chemistry and Chemical Engineering, Hainan Normal University, Haikou 571158, P R China.

<sup>2</sup> College of Health Sciences, Hainan Technology and Business College, Haikou 570102, P R China.

<sup>3</sup> College of Chemical and Environmental Engineering, Chongqing University of Arts and Sciences, Chongqing 402160, P R China.

<sup>4</sup> College of Chemistry and Chemical Engineering, Zhaotong University, Zhaotong 657000, P R China.

\*Corresponding authors.

E-mail address: [sunwei@hainnu.edu.cn](mailto:sunwei@hainnu.edu.cn) (W. Sun); [god820403@163.com](mailto:god820403@163.com) (X. H. Wang).

= Baoli Wang and Yuhao Huang contributed equally to this work.

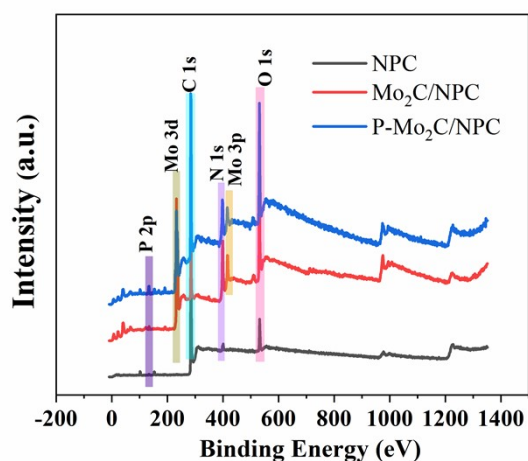

**Fig. S1.** XPS survey of NPC, Mo<sub>2</sub>C/NPC and P-Mo<sub>2</sub>C/NPC.

**Table S1** Surface Elemental Composition Determined by XPS

| Materials               | N (at%) | P (at%) | C (at%) | O (at%) | Mo (at%) |
|-------------------------|---------|---------|---------|---------|----------|
| P-Mo <sub>2</sub> C@NPC | 15.55   | 2.20    | 58.59   | 19.21   | 4.45     |
| Mo <sub>2</sub> C@NC    | 18.60   | 1.70    | 43.68   | 28.3    | 7.72     |
| NPC                     | 3.74    | 0.77    | 86.65   | 8.84    | /        |

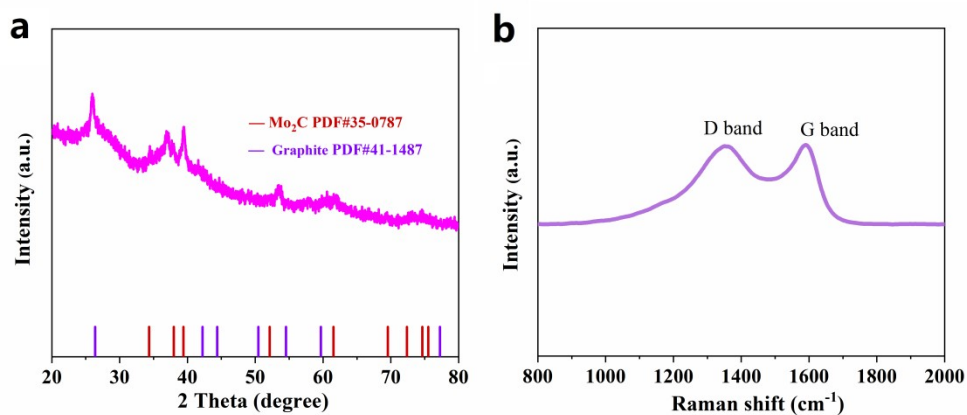

**Fig. S2.** (a) XRD pattern and (b) Raman spectrum of P-Mo<sub>2</sub>C/NPCt.

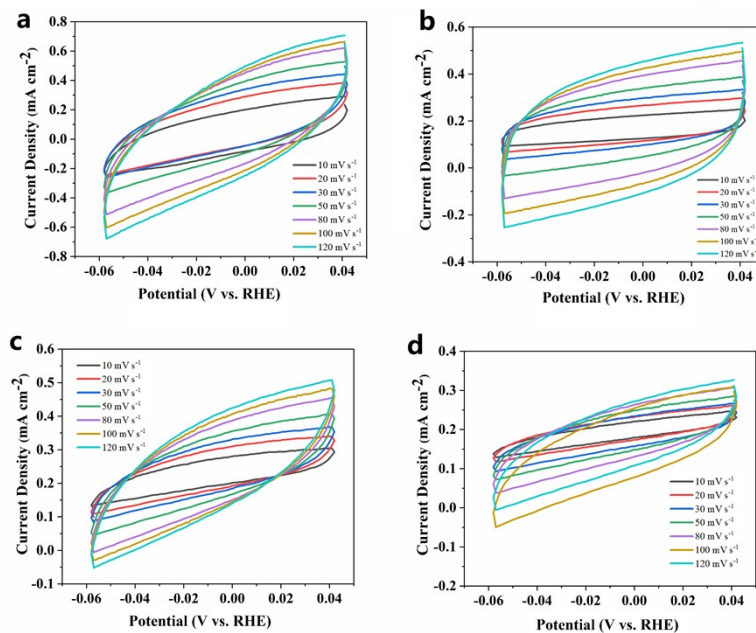

**Fig. S3.** CV plots of (a) P-Mo<sub>2</sub>C/NPC, (b) P-Mo<sub>2</sub>C/NPCt, (c) Mo<sub>2</sub>C/NPC and (d) NPC in 0.5 M H<sub>2</sub>SO<sub>4</sub> at a scan rate ranging from 10 mV s<sup>-1</sup> to 120 mV s<sup>-1</sup> within a potential of -0.04 V to 0.06 V (vs. RHE) for ECSA tests.

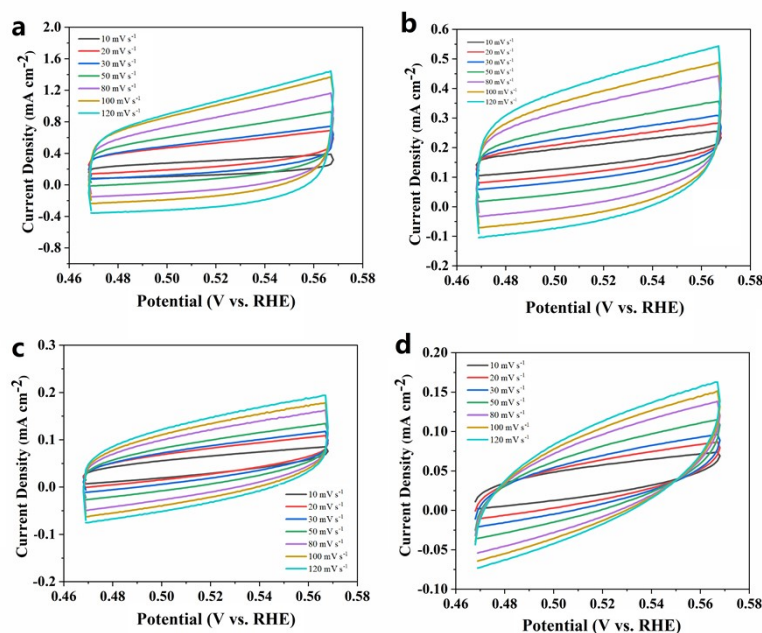

**Fig. S4.** CV plots of (a) P-Mo<sub>2</sub>C/NPC, (b) P-Mo<sub>2</sub>C/NPCt, (c) Mo<sub>2</sub>C/NPC and (d) NPC in 1.0 M KOH at a scan rate ranging from 10 mV s<sup>-1</sup> to 120 mV s<sup>-1</sup> within a potential of 0.46 V to 0.58 V (vs. RHE) for ECSA tests.
